# Supplementary material for: Regulatory T cell phenotype and anti-osteoclastogenic function in experimental periodontitis
Source: PubMed Central journal article supplement (PMC7642388; doi:10.1038/s41598-020-76038-w), 2020-11-04
Supplement: 41598_2020_76038_MOESM1_ESM.pdf [file 41598_2020_76038_MOESM1_ESM.pdf]

## **Regulatory T cell phenotype and anti-osteoclastogenic function in experimental periodontitis**

Carla Alvarez<sup>1,2</sup>, Salwa Suliman<sup>1,3</sup>, Rawan Almarhoumi<sup>1</sup>, Maria Elena Vega<sup>2</sup>, Carolina Rojas<sup>2</sup>, Gustavo Monasterio<sup>2</sup>, Mario Galindo<sup>4,5</sup>, Rolando Vernal<sup>2\*</sup>, and Alpdogan Kantarci<sup>1\*</sup>

*Supplementary Table.* Forward and Reverse primers used for cDNA amplifications by qPCR.

| <i>Target</i>                  | <i>Forward Primer</i>             | <i>Reverse Primer</i>           |
|--------------------------------|-----------------------------------|---------------------------------|
| <i>CD25</i>                    | <i>TGTGCTCACAATGGAGTATAAGG</i>    | <i>CTCAGGAGGAGGATGCTGAT</i>     |
| <i>CTLA-4</i>                  | <i>GACGCAGATTTATGTCATTGCTA</i>    | <i>GGCTGAAATTGCTTTTCACAT</i>    |
| <i>Foxp3</i>                   | <i>GCACTGTGCCTGGTATATGCT</i>      | <i>CTTCCAAGTCTCGTCTGAAGG</i>    |
| <i>GITR</i>                    | <i>GAAGTCATGGCTCTTGTGCAT</i>      | <i>CAGGACTCGATGGCAGTTG</i>      |
| <i>IL-10</i>                   | <i>CAGAGCCACATGCTCCTAGA</i>       | <i>TGTCCAGCTGGTCCTTTGTT</i>     |
| <i>IL-2</i>                    | <i>GCTGTTGATGGACCTACAGGA</i>      | <i>TTCAATTCTGTGGCCTGCTT</i>     |
| <i>IL-6</i>                    | <i>GCTACCAAACCTGGATATAATCAGGA</i> | <i>CCAGGTAGCTATGGTACTCCAGAA</i> |
| <i>RANKL</i>                   | <i>AGCCATTTGCACACCTCAC</i>        | <i>AGCCATTTGCACACCTCAC</i>      |
| <i>IL-17A</i>                  | <i>CATGAGTCCAGGGAGAGCTT</i>       | <i>GCTGAGCTTTGAGGGATGAT</i>     |
| <i>IL-17F</i>                  | <i>CCCAGGAAGACATACTTAGAAGAAA</i>  | <i>CAACAGTAGCAAAGACTTGACCA</i>  |
| <i>Roryt</i>                   | <i>ACTGCCAGCTGTGTGCTGT</i>        | <i>CATTGCCAATCCAAAGCAG</i>      |
| <i>TGF-<math>\beta</math>1</i> | <i>TGGAGCAACATGTGGAACTC</i>       | <i>GTCAGCAGCCGGTTACCA</i>       |
| <i>18S rRNA</i>                | <i>GCAATTATTCCCATGAACG</i>        | <i>GGGACTTAATCAACGCAAGC</i>     |

*CTLA-4*, Cytotoxic T-Lymphocyte Antigen 4; *Foxp3*, Forkhead box P3; *GITR*, Glucocorticoid-induced TNFR family-related gene; *IL*, interleukin; *RANKL*, receptor-activator of nuclear factor-kappa B ligand; *Roryt*, nuclear receptor retinoic acid receptor-related orphan receptor gamma; *TGF*, tumor growth factor.
