# Supplementary material for: Regulatory T cell phenotype and anti-osteoclastogenic function in experimental periodontitis
Source: PubMed Central journal article supplement (PMC7642388; doi:10.1038/s41598-020-76038-w), 2020-11-04
Supplement: 41598_2020_76038_MOESM2_ESM.pdf [file 41598_2020_76038_MOESM2_ESM.pdf]

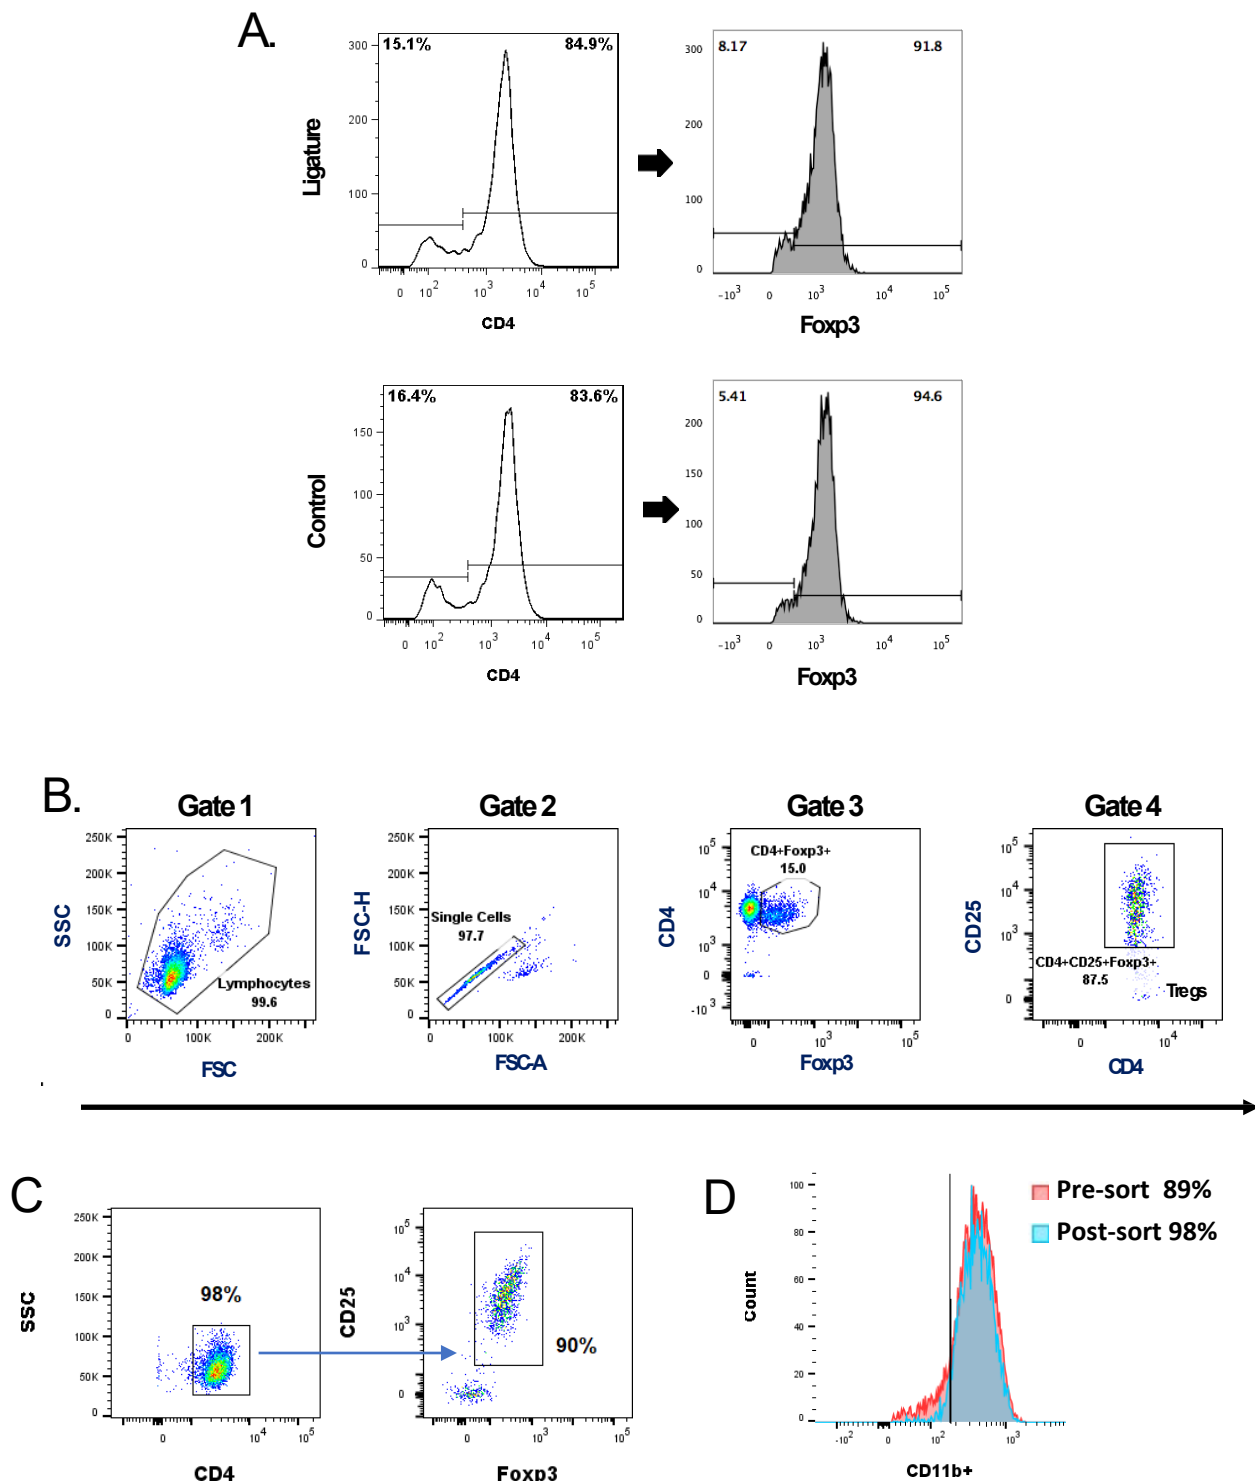

**Supplementary Figure 1. Cell purification methods.** A) Flow cytometry analysis of CD4<sup>+</sup>CD25<sup>+</sup> cells isolated from WT animals using the microbeads-based immune-isolation system. B) Gating strategy for CD4<sup>+</sup>CD25<sup>+</sup>Foxp3<sup>+</sup>(eGFP) cell sorting from reporter animals. C) Post-sort analysis of the CD4<sup>+</sup>CD25<sup>+</sup>Foxp3<sup>+</sup> cells. D) Pre and post-sort analysis of BMM derived CD11b<sup>+</sup> cells.
