# Supplementary material for: Regulatory T cell phenotype and anti-osteoclastogenic function in experimental periodontitis
Source: PubMed Central journal article supplement (PMC7642388; doi:10.1038/s41598-020-76038-w), 2020-11-04
Supplement: 41598_2020_76038_MOESM3_ESM.pdf [file 41598_2020_76038_MOESM3_ESM.pdf]

## **Regulatory T cell phenotype and anti-osteoclastogenic function in experimental periodontitis**

Carla Alvarez<sup>1,2</sup>, Salwa Suliman<sup>1,3</sup>, Rawan Almarhoumi<sup>1</sup>, Maria Elena Vega<sup>2</sup>, Carolina Rojas<sup>2</sup>, Gustavo Monasterio<sup>2</sup>, Mario Galindo<sup>4,5</sup>, Rolando Vernal<sup>2\*</sup>, and Alpdogan Kantarci<sup>1\*</sup>

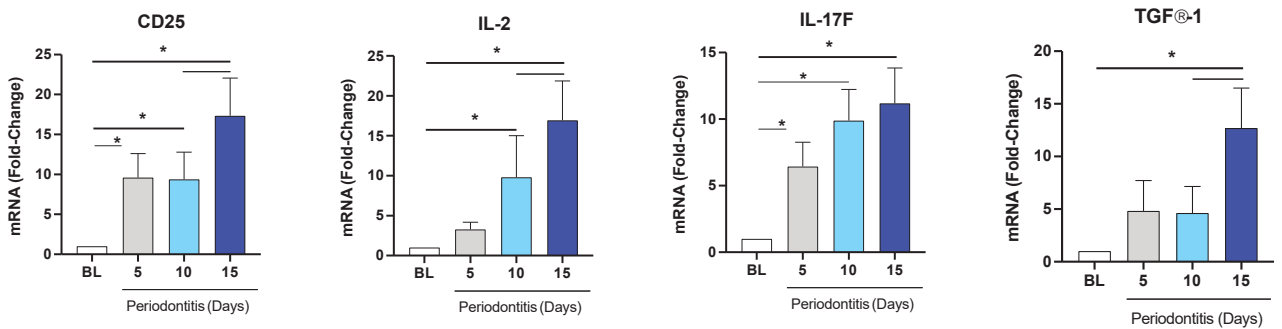

**Supplementary Figure 2. Expression profile of Th17 and Tregs markers in periodontal lesions.** mRNA fold-change levels of CD25, IL-2, IL-17F, and TGFβ1 in periodontal lesions of animals with ligature-induced periodontitis and control animals (BL). \* $P < 0.05$ .
